# Supplementary material
Source: Springer Nature journal article supplement (https://www.springermedizin.de/resource/supplementary/13012_2012_622_MOESM1_ESM.pdf/9630348)

**Informs**

**Informs**

Micro  
Individual patients  
and staff

**Evidence**

**Evaluation**

**Interventions**

Standard dissemination  
+ feedback of pre-  
intervention fasting  
times (SD + F)

Opinion Leader + web  
based education tool  
+ (SD + F)

Plan Do Study Act –  
quality improvement  
cycle + (SD + F)

**Measurement**

**•Summative**

Patient food and fluid  
fasting times x4 pre- and  
x4 post-intervention

**•Process**

Patient interviews  
& questionnaire

Staff interviews  
& focus groups

Learning  
Organization  
Survey

Economic evaluation

**Outcomes**

**•Summative**

Fasting interrupted  
time series

**•Process**

Patient experiences of  
fasting care

Staff perspectives of  
barriers and facilitators  
to implementation

Organisational learning  
characteristics

Cost consequences for  
organisation of  
interventions

Meso  
Departments and  
teams

**Facilitation**

**Context**

**Informs re-evaluation**

Macro  
Organisation

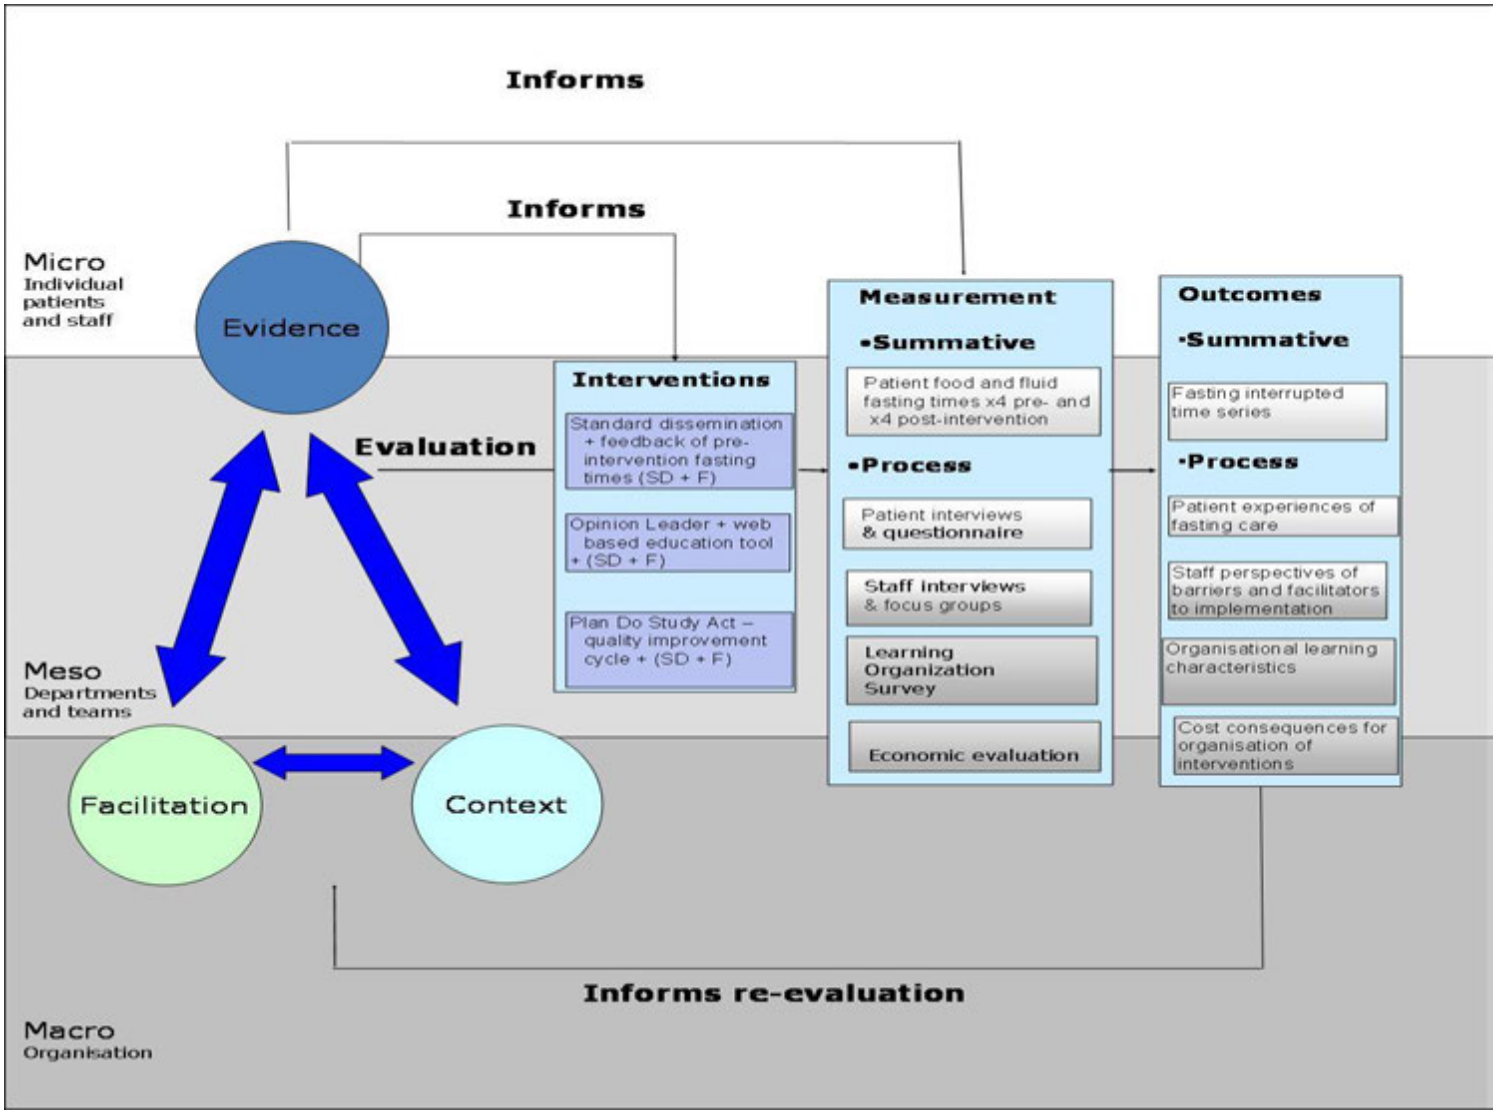

Supplement: MOESM1 [file 9630348]
